# Supplementary material
Source: Research Square preprint supplement (doi:10.21203/rs.3.rs-9106466/v1)
Supplement: Supplementary file 1 [file 3ba6031462c4320cae9ad1f3.docx]

**Microwave synthesis of FeNiSb medium-entropy alloy as high-performance electrode for symmetric supercapacitors**

Weiwei Zhao, Xue Wang, Shuai Zhang, Shuangyi He and Jujie Luo[[1]](#footnote-1)

College of Materials Science and Engineering, Taiyuan University of Technology, Taiyuan 030024, PR China

**1. Experimental Section**

1.1 Preparation of NF

Cut nickel foam (NF) into 1×1 cm2 cubes and place them in anhydrous ethanol for ultrasonic cleaning for 40 minutes. Remove the NF and place it in a glass dish, then dry it in an 80°C oven.

1.2. Chemicals

NiCl2⋅6H2O (99.5%), FeCl3 (99.9%), and SbCl3 (99.9 %) were supplied by Aladdin Reagent (Shanghai) Co., Ltd. Ethylene glycol (EG, 99%) and ethylenediamine (EDA, 99%) were purchased from Beijing MREDA Technology Co., Ltd. KOH (99%) was sourced from Shanghai Macklin Biochemical Co., Ltd. NF was bought from Longshengbao Electronic Materials Co., Ltd.

1.3 Characterization techniques

Elemental composition was determined with a Thermo Fisher ESCALAB Xi+ system via X-ray photoelectron spectroscopy (XPS). The crystal structure of all samples was analyzed using X-ray diffractometer (XRD, Rigaku Ultima IV). A ZEISS Sigma500 scanning electron microscopy (SEM) was used to analyze morphological characteristics and elemental composition of FeNiSb samples under all conditions equipped with an energy-dispersive X-ray spectroscopy (EDS) detector. To further analyze the crystalline phase composition, transmission electron microscopy (TEM) was conducted on a JEM-2100Plus instrument.

**2.** **Characterization section**


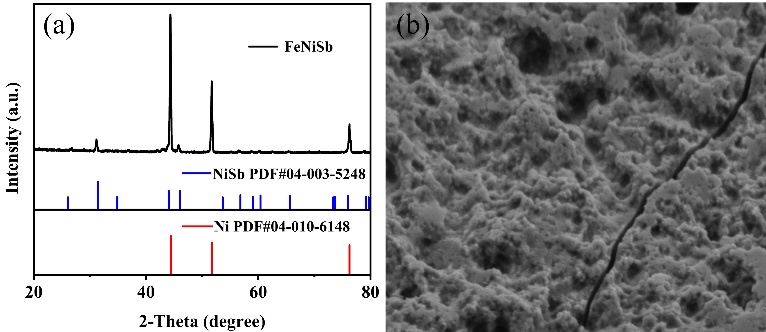


Fig. S1 (a) XRD pattern, (b) SEM of the FeNiSb electrode after long-term cycling.

Table S1 and of different samples FeNiSb/NF.

| Sample | () | () |
| --- | --- | --- |
| T1 | 0.75245 | 0.17571 |
| T2 | 0.54125 | 0.10658 |
| T3 | 0.71923 | 0.33634 |
| S1 | 0.75668 | 0.11395 |
| S2 | 0.67901 | 1.1870 |

**3.** **Characterization section**


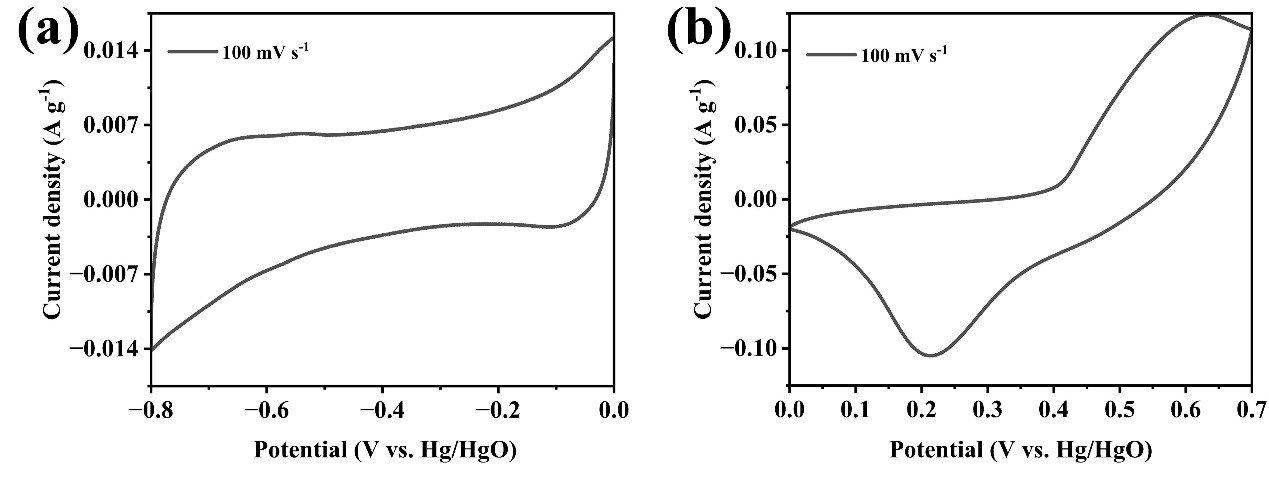


Figure S2: CV of FeNiSb electrode in 6 M KOH to show the most negative (0.0 to -0.8 V) and positive (0.0 to 0.7 V) potential limits at scan rates of 100 mV

1. Corresponding author.

   E-mail address: luojujie@126.com. [↑](#footnote-ref-1)
